# Supplementary material
Source: PubMed Central journal article supplement (PMC5793674)
Supplement: asw054_supp.pdf [file asw054_supp.pdf]

# Supplementary material for Inference in a Survival Cure Model with Mismeasured Covariates using a Simulation-Extrapolation Approach

BY AURELIE BERTRAND, CATHERINE LEGRAND

*Institute of Statistics, Biostatistics and Actuarial Sciences, Université catholique de Louvain,*

*Voie du Roman Pays 20, 1348 Louvain-la-Neuve, Belgium*

aurelie.bertrand@uclouvain.be, catherine.legrand@uclouvain.be

RAYMOND J. CARROLL

*Department of Statistics, Texas A&M University, College Station, 447 Blocker Building, Texas*

*77843-3143, U.S.A.*

carroll@stat.tamu.edu

CHRISTOPHE DE MEESTER

*Cardiovascular Research Group, Institute of Experimental and Clinical Research, Université catholique de Louvain, Avenue Hippocrate 55, 1200 Brussels, Belgium*

christophe.demeester@uclouvain.be

AND INGRID VAN KEILEGOM

*Institute of Statistics, Biostatistics and Actuarial Sciences, Université catholique de Louvain,*

*Voie du Roman Pays 20, 1348 Louvain-la-Neuve, Belgium*

ingrid.vankeilegom@uclouvain.be

## 1. PROOF OF THEOREM 1

For a fixed  $\lambda$  and a fixed  $b$ , we have from Theorem 1 in Zeng et al. (2006) that  $\|\hat{\beta}_{\lambda,b} - \beta_{\lambda}\| \rightarrow 0$ ,  $\sup_{t \in \mathbb{R}^+} |\hat{F}_{\lambda,b}(t) - F_{\lambda}(t)| \rightarrow 0$ , with probability 1. As a result, for a fixed  $\lambda$ , since  $\hat{\beta}_{\lambda} = B^{-1} \sum_{b=1}^B \hat{\beta}_{\lambda,b}$  and  $\hat{F}_{\lambda} = B^{-1} \sum_{b=1}^B \hat{F}_{\lambda,b}$ , by Slutsky's theorem,  $\|\hat{\beta}_{\lambda} - \beta_{\lambda}\| \rightarrow 0$ ,  $\sup_{t \in \mathbb{R}^+} |\hat{F}_{\lambda}(t) - F_{\lambda}(t)| \rightarrow 0$  with probability 1.

An immediate result is that  $\|\hat{\beta}(\Lambda) - \beta(\Lambda)\| \rightarrow 0$ ,  $\sup_{t \in \mathbb{R}^+} |\hat{F}(\Lambda, t) - F(\Lambda, t)| \rightarrow 0$ , with probability 1, where  $\beta(\Lambda) = (\beta_{\lambda_1}^T, \dots, \beta_{\lambda_K}^T)^T$  and  $F(\Lambda, t) = \{F_{\lambda_1}(t), \dots, F_{\lambda_K}(t)\}^T$ , for a finite grid  $\Lambda = (\lambda_1, \dots, \lambda_K)^T$ .

We now take the extrapolation step of the simex algorithm into account. We first show the consistency of  $\hat{\beta}_{\text{SIMEX}}$ . Similarly to what is done in Li & Lin (2003), suppose that  $\beta_{\lambda}$  can be specified using a parametric model  $g_{\beta}(\gamma_{\beta}, \lambda)$  depending on a vector of parameters  $\gamma_{\beta}$ . Under the assumption that this is the true extrapolation function, we have that  $\beta_{\text{TRUE}} = g_{\beta}(\gamma_{\beta}, -1)$  and  $\hat{\beta}_{\text{SIMEX}} = g_{\beta}(\hat{\gamma}_{\beta}, -1)$ , where  $\hat{\gamma}_{\beta}$  solves, by the least squares estimation method,  $\dot{g}_{\beta}(\gamma_{\beta}, \Lambda)^T \{g_{\beta}(\gamma_{\beta}, \Lambda) - \hat{\beta}(\Lambda)\} = 0$  and  $\dot{g}_{\beta}(\gamma_{\beta}, \Lambda)$  is the  $PK \times \dim(\gamma_{\beta})$  matrix of partial derivatives of the elements of  $g_{\beta}(\gamma_{\beta}, \Lambda)$  with respect to the elements of  $\gamma_{\beta}$ .

We then have that

$$\widehat{\gamma}_\beta - \gamma_\beta = \{\dot{g}_\beta(\gamma_\beta, \Lambda)^T \dot{g}_\beta(\gamma_\beta, \Lambda)\}^{-1} \dot{g}_\beta(\gamma_\beta, \Lambda)^T \{\widehat{\beta}(\Lambda) - \beta(\Lambda)\} + o_p(1)$$

and hence, with probability 1,  $\|\widehat{\gamma}_\beta - \gamma_\beta\| \rightarrow 0$ ,  $n \rightarrow \infty$ , by the continuous mapping theorem, if  $\dot{g}_\beta(\gamma_\beta, \Lambda)$  is bounded and  $\dot{g}_\beta(\gamma_\beta, \Lambda)^T \dot{g}_\beta(\gamma_\beta, \Lambda)$  is invertible. Finally, by using once again the continuous mapping theorem, since  $\widehat{\beta}_{\text{SIMEX}} = g_\beta(\widehat{\gamma}_\beta, -1)$  and  $\beta_{\text{TRUE}} = g_\beta(\gamma_\beta, -1)$ , we find that, with probability 1,

$$\|\widehat{\beta}_{\text{SIMEX}} - \beta_{\text{TRUE}}\| \rightarrow 0.$$

We finally turn to the proof of the consistency of  $\widehat{F}_{\text{SIMEX}}$ . Similarly to what is done in Li & Lin (2003), suppose that, for a fixed  $t$ ,  $F_\lambda(t)$  can be specified using a parametric model  $g_t(\gamma_t, \lambda)$  depending on a parameter vector  $\gamma_t$ . If this is the true extrapolation function, we have  $F_{\text{TRUE}}(t) = g_t(\gamma_t, -1)$  and  $\widehat{F}_{\text{SIMEX}}(t) = g_t(\widehat{\gamma}_t, -1)$ , where  $\widehat{\gamma}_t$  is a solution of  $\dot{g}_t(\gamma_t, \Lambda)^T \{g_t(\gamma_t, \Lambda) - \widehat{F}(\Lambda, t)\} = 0$  and  $\dot{g}_t(\gamma_t, \Lambda) = \partial g_t(\gamma_t, \Lambda) / \partial \gamma_t^T$ . It now follows that

$$\widehat{\gamma}_t - \gamma_t = \{\dot{g}_t(\gamma_t, \Lambda)^T \dot{g}_t(\gamma_t, \Lambda)\}^{-1} \dot{g}_t(\gamma_t, \Lambda)^T \{\widehat{F}(\Lambda, t) - F(\Lambda, t)\} + o_p(1)$$

and hence, with probability 1,  $\sup_{t \in \mathbb{R}^+} \|\widehat{\gamma}_t - \gamma_t\| \rightarrow 0$ , by the continuous mapping theorem, assuming that  $\dot{g}_t(\gamma_t, \Lambda)$  is bounded uniformly in  $t$  and that  $\dot{g}_t(\gamma_t, \Lambda)^T \dot{g}_t(\gamma_t, \Lambda)$  is invertible. Finally, by using once again the continuous mapping theorem, since  $\widehat{F}_{\text{SIMEX}}(t) = g_t(\widehat{\gamma}_t, -1)$  and  $F_{\text{TRUE}}(t) = g_t(\gamma_t, -1)$ , we find that, with probability 1,

$$\sup_{t \in \mathbb{R}^+} |\widehat{F}_{\text{SIMEX}}(t) - F_{\text{TRUE}}(t)| \rightarrow 0.$$

35

## 2. SIMULATION RESULTS

Table 1 summarizes the results obtained for the 4 settings described in Section 4.2 with  $\mu = 1.0$ , while Table 2 pertains to the settings of Section 4.3 with  $\mu = 1.0$ .

Table 3 reports the results of a simulation study investigating the impact of the choice of the grid of values for  $\lambda$  in the simex method. We still consider the same setting as in Subsection 4.4, and compare the estimates obtained by using  $\lambda \in \{0, 0.5, 1, 1.5, 2\}$ , as in all previous simulation settings, with those obtained with  $\lambda \in \{0, 0.25, 0.5, 0.75, 1, 1.25, 1.5, 1.75, 2\}$ . The quadratic extrapolation function was used. It appears that both grids of  $\lambda$  values yield nearly identical results in this setting.

40

Table 1: Empirical bias, empirical and estimated variances, coverages and mean squared errors for the settings with one mismeasured covariate, when  $\mu = 1.0$ 

| $n$ | $v$ | Estimate  | Ma & Yin method |           |           | Naive method |           |           | Simex method |           |           |
|-----|-----|-----------|-----------------|-----------|-----------|--------------|-----------|-----------|--------------|-----------|-----------|
|     |     |           | $\beta_0$       | $\beta_1$ | $\beta_2$ | $\beta_0$    | $\beta_1$ | $\beta_2$ | $\beta_0$    | $\beta_1$ | $\beta_2$ |
| 200 | 0.1 | Bias      | 0.2             | 1.8       | -0.6      | 5.4          | -10.2     | -0.2      | 0.7          | 0.4       | -0.5      |
|     |     | Emp. var. | 4.1             | 10.2      | 3.0       | 3.6          | 7.7       | 3.0       | 4.1          | 9.8       | 3.0       |
|     |     | Est. var. | 4.2             | 10.0      | 2.8       | 3.7          | 7.6       | 2.8       | 4.1          | 9.6       | 2.8       |
|     |     | 95% cv    | 94.8            | 94.6      | 94.2      | 94.0         | 92.8      | 94.6      | 94.8         | 94.4      | 94.2      |
|     |     | MSE       | 4.1             | 10.2      | 3.0       | 3.9          | 8.7       | 3.0       | 4.1          | 9.8       | 3.0       |
| 200 | 0.2 | Bias      | -1.4            | 5.9       | -0.8      | 15.1         | -32.3     | 0.3       | 4.6          | -8.5      | -0.2      |
|     |     | Emp. var. | 5.2             | 17.1      | 3.2       | 3.2          | 6.0       | 3.0       | 4.2          | 11.3      | 3.1       |
|     |     | Est. var. | 5.6             | 16.7      | 3.0       | 3.2          | 5.7       | 2.8       | 4.1          | 9.8       | 2.8       |
|     |     | 95% cv    | 96.4            | 96.0      | 94.0      | 87.0         | 73.0      | 94.8      | 92.8         | 91.6      | 94.0      |
|     |     | MSE       | 5.2             | 17.4      | 3.2       | 5.5          | 16.4      | 3.0       | 4.4          | 12.0      | 3.1       |
| 300 | 0.1 | Bias      | -0.4            | 2.4       | -0.9      | 4.8          | -9.4      | -0.6      | 0.1          | 1.3       | -0.9      |
|     |     | Emp. var. | 3.1             | 7.1       | 2.0       | 2.8          | 5.4       | 2.0       | 3.0          | 6.9       | 2.0       |
|     |     | Est. var. | 2.8             | 6.6       | 1.9       | 2.4          | 5.0       | 1.8       | 2.7          | 6.4       | 1.9       |
|     |     | 95% cv    | 95.4            | 94.6      | 95.6      | 91.6         | 90.4      | 95.0      | 94.4         | 94.2      | 95.4      |
|     |     | MSE       | 3.1             | 7.1       | 2.1       | 3.0          | 6.3       | 2.0       | 3.0          | 6.9       | 2.1       |
| 300 | 0.2 | Bias      | -1.3            | 4.9       | -1.2      | 14.6         | -31.6     | -0.1      | 3.9          | -7.6      | -0.9      |
|     |     | Emp. var. | 3.7             | 10.4      | 2.2       | 2.4          | 3.9       | 2.0       | 3.1          | 7.5       | 2.1       |
|     |     | Est. var. | 3.5             | 10.4      | 2.0       | 2.1          | 3.8       | 1.8       | 2.7          | 6.5       | 1.9       |
|     |     | 95% cv    | 96.4            | 96.6      | 94.8      | 82.5         | 63.8      | 94.0      | 92.2         | 92.4      | 94.7      |
|     |     | MSE       | 3.7             | 10.6      | 2.2       | 4.5          | 13.9      | 2.0       | 3.3          | 8.1       | 2.1       |

Emp. var., empirical variance; Est. var., estimated variance; 95% cv, coverage probabilities of 95% confidence intervals computed based on the asymptotic normal distribution; MSE, mean squared error. NOTE: All numbers were multiplied by 100.

Table 2: Empirical bias, empirical and estimated variances, coverages and mean squared errors for the settings with two mismeasured covariates, when  $\mu = 1.0$ 

| Estimate  | Ma & Yin method                 |           |           |           | Naive method |           |           |           | Simex method |           |           |           |
|-----------|---------------------------------|-----------|-----------|-----------|--------------|-----------|-----------|-----------|--------------|-----------|-----------|-----------|
|           | $\beta_0$                       | $\beta_1$ | $\beta_2$ | $\beta_3$ | $\beta_0$    | $\beta_1$ | $\beta_2$ | $\beta_3$ | $\beta_0$    | $\beta_1$ | $\beta_2$ | $\beta_3$ |
|           | $n = 200, v_1 = 0.1, v_2 = 0.1$ |           |           |           |              |           |           |           |              |           |           |           |
| Bias      | 0.4                             | 0.7       | 1.3       | -0.6      | 5.1          | -11.7     | -0.9      | -0.1      | 1.1          | -1.1      | 1.0       | -0.5      |
| Emp. var. | 5.7                             | 11.8      | 1.3       | 3.2       | 5.0          | 8.8       | 1.2       | 3.1       | 5.6          | 11.3      | 1.3       | 3.1       |
| Est. var. | 4.9                             | 10.9      | 1.2       | 3.1       | 4.2          | 8.1       | 1.1       | 3.0       | 4.7          | 10.3      | 1.2       | 3.1       |
| 95% cv    | 93.0                            | 94.6      | 94.8      | 95.8      | 91.8         | 92.6      | 94.8      | 96.0      | 92.4         | 94.8      | 94.2      | 96.0      |
| MSE       | 5.7                             | 11.8      | 1.3       | 3.2       | 5.3          | 10.1      | 1.2       | 3.1       | 5.6          | 11.3      | 1.3       | 3.1       |
|           | $n = 200, v_1 = 0.2, v_2 = 0.2$ |           |           |           |              |           |           |           |              |           |           |           |
| Bias      | -0.9                            | 5.0       | 2.4       | -1.1      | 13.5         | -34.6     | -6.0      | 1.0       | 5.2          | -11.1     | 0.3       | -0.3      |
| Emp. var. | 7.6                             | 20.5      | 1.7       | 3.5       | 4.6          | 6.8       | 1.1       | 3.1       | 6.2          | 13.4      | 1.4       | 3.3       |
| Est. var. | 6.6                             | 18.7      | 1.5       | 3.4       | 3.7          | 6.1       | 1.0       | 3.0       | 4.8          | 10.7      | 1.3       | 3.2       |
| 95% cv    | 94.4                            | 95.2      | 95.0      | 95.2      | 86.4         | 71.0      | 90.2      | 95.2      | 91.0         | 90.8      | 95.2      | 94.8      |
| MSE       | 7.6                             | 20.8      | 1.7       | 3.6       | 6.4          | 18.7      | 1.5       | 3.1       | 6.4          | 14.6      | 1.4       | 3.3       |
|           | $n = 300, v_1 = 0.1, v_2 = 0.1$ |           |           |           |              |           |           |           |              |           |           |           |
| Bias      | 1.6                             | 1.2       | 0.9       | -0.9      | 6.2          | -11.0     | -1.3      | -0.3      | 2.0          | -0.1      | 0.7       | -0.8      |
| Emp. var. | 3.2                             | 7.6       | 0.8       | 2.0       | 2.8          | 5.8       | 0.7       | 1.9       | 3.2          | 7.5       | 0.8       | 2.0       |
| Est. var. | 3.2                             | 7.1       | 0.8       | 2.0       | 2.8          | 5.4       | 0.7       | 2.0       | 3.1          | 6.8       | 0.8       | 2.0       |
| 95% cv    | 95.8                            | 94.0      | 96.0      | 95.6      | 93.2         | 92.8      | 95.2      | 95.4      | 94.8         | 94.0      | 96.0      | 95.8      |
| MSE       | 3.2                             | 7.6       | 0.8       | 2.0       | 3.2          | 7.0       | 0.7       | 1.9       | 3.2          | 7.5       | 0.8       | 2.0       |
|           | $n = 300, v_1 = 0.2, v_2 = 0.2$ |           |           |           |              |           |           |           |              |           |           |           |
| Bias      | 0.5                             | 4.5       | 1.7       | -1.1      | 14.6         | -33.8     | -6.3      | 0.7       | 6.2          | -9.7      | 0.2       | -0.6      |
| Emp. var. | 4.2                             | 12.5      | 1.0       | 2.1       | 2.5          | 4.5       | 0.7       | 1.9       | 3.5          | 8.7       | 0.9       | 2.1       |
| Est. var. | 4.2                             | 11.7      | 1.0       | 2.2       | 2.5          | 4.0       | 0.7       | 2.0       | 3.2          | 7.1       | 0.9       | 2.1       |
| 95% cv    | 95.4                            | 94.8      | 96.4      | 95.4      | 84.8         | 60.8      | 87.2      | 95.4      | 92.0         | 90.6      | 96.0      | 95.0      |
| MSE       | 4.2                             | 12.7      | 1.0       | 2.1       | 4.6          | 15.9      | 1.1       | 1.9       | 3.9          | 9.6       | 0.9       | 2.1       |

Emp. var., empirical variance; Est. var., estimated variance; 95% cv, coverage probabilities of 95% confidence intervals computed based on the asymptotic normal distribution; MSE, mean squared error.

NOTE: All numbers were multiplied by 100.

Table 3: Empirical bias, empirical and estimated variances, coverages and mean squared errors for the simulations investigating the robustness of simex with respect to the grid of  $\lambda$ 

| $n$       | $v$  |           | $\lambda \in \{0, 0.5, 1, 1.5, 2\}$ |           |           | $\lambda \in \{0, 0.25, 0.5, 0.75, 1, 1.25, 1.5, 1.75, 2\}$ |           |           |
|-----------|------|-----------|-------------------------------------|-----------|-----------|-------------------------------------------------------------|-----------|-----------|
|           |      |           | $\beta_0$                           | $\beta_1$ | $\beta_2$ | $\beta_0$                                                   | $\beta_1$ | $\beta_2$ |
| 200       | 0.1  | Bias      | -1.4                                | -0.3      | -2.2      | -1.4                                                        | -0.3      | -2.2      |
|           |      | Emp. var. | 12.4                                | 20.6      | 6.7       | 12.4                                                        | 20.6      | 6.7       |
|           |      | Est. Var. | 10.8                                | 19.1      | 6.3       | 10.7                                                        | 19.1      | 6.3       |
|           |      | 95% cv    | 93.4                                | 95.8      | 94.8      | 93.4                                                        | 96.2      | 94.8      |
|           |      | MSE       | 12.4                                | 20.6      | 6.8       | 12.4                                                        | 20.6      | 6.8       |
|           |      | 200       | 0.25                                | Bias      | 7.2       | -18.2                                                       | -2.0      | 7.4       |
| Emp. var. | 12.1 |           |                                     | 21.0      | 6.8       | 12.1                                                        | 20.7      | 6.8       |
| Est. Var. | 9.7  |           |                                     | 14.8      | 6.3       | 9.7                                                         | 14.6      | 6.3       |
| 95% cv    | 92.7 |           |                                     | 88.8      | 95.1      | 92.7                                                        | 88.6      | 95.1      |
| MSE       | 12.7 |           |                                     | 24.3      | 6.8       | 12.6                                                        | 24.2      | 6.8       |
| 300       | 0.1  |           |                                     | Bias      | -2.5      | 1.3                                                         | -1.3      | -2.5      |
|           |      | Emp. var. | 9.9                                 | 16.5      | 4.3       | 9.8                                                         | 16.4      | 4.3       |
|           |      | Est. Var. | 7.6                                 | 12.5      | 4.1       | 7.6                                                         | 12.5      | 4.1       |
|           |      | 95% cv    | 92.8                                | 94.0      | 95.6      | 92.8                                                        | 93.8      | 95.6      |
|           |      | MSE       | 10.0                                | 16.5      | 4.4       | 9.9                                                         | 16.4      | 4.4       |
|           |      | 300       | 0.25                                | Bias      | 5.8       | -15.3                                                       | -1.4      | 6.1       |
| Emp. var. | 10.0 |           |                                     | 17.7      | 4.4       | 9.9                                                         | 17.4      | 4.4       |
| Est. Var. | 7.0  |           |                                     | 9.8       | 4.2       | 6.9                                                         | 9.7       | 4.2       |
| 95% cv    | 89.7 |           |                                     | 84.3      | 95.6      | 89.7                                                        | 83.9      | 95.6      |
| MSE       | 10.3 |           |                                     | 20.0      | 4.5       | 10.3                                                        | 19.9      | 4.4       |

Emp. var., empirical variance; Est. var., estimated variance; 95% cv, coverage probabilities of 95% confidence intervals computed based on the asymptotic normal distribution; MSE, mean squared error. NOTE: All numbers were multiplied by 100.

REFERENCES

- <sup>45</sup> LI, Y. & LIN, X. (2003). Functional inference in frailty measurement error models for clustered survival data using the simex approach. *J. Am. Statist. Assoc.* **98**, 191–203.
- ZENG, D., YIN, G. & IBRAHIM, J. G. (2006). Semiparametric transformation models for survival data with a cure fraction. *J. Am. Statist. Assoc.* **101**, 670–684.
